# Supplementary material for: Bacterial Quorum-Sensing Signal Arrests Phytoplankton Cell Division and Impacts Virus-Induced Mortality
Source: PubMed Central journal article supplement (PMC8125044; doi:10.1128/msphere.00009-21), 2021-05-12
Supplement: mSphere.00009-21-sf005.pdf [file mSphere.00009-21-sf005.pdf]

Supplemental Figure 5.

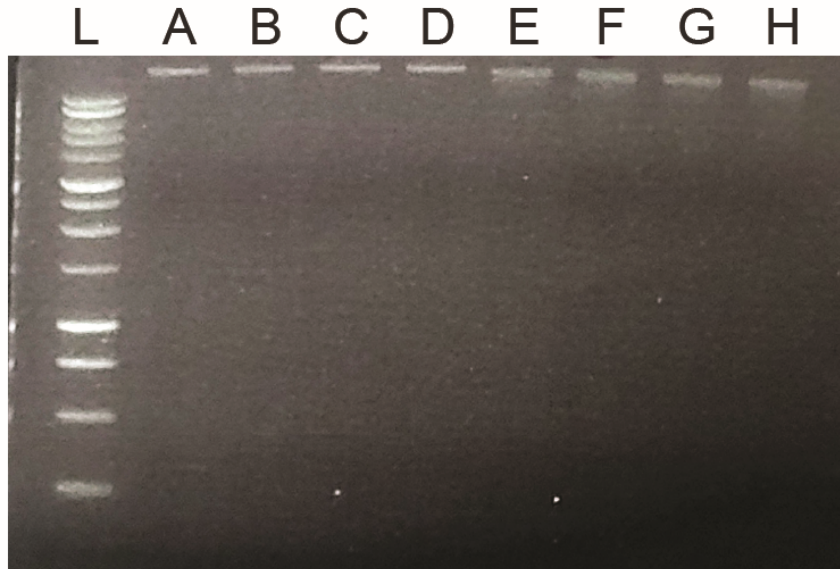

- L: DNA ladder (Promega G5711)
- A: 510 ng lambda + 1% DMSO (Rep 1)
- B: 510 ng lambda + 1% DMSO (Rep 2)
- C: 510 ng lambda + 100 ng/ml HHQ (Rep 1)
- D: 510 ng lambda + 100 ng/ml HHQ (Rep 2)
- E: 500 ng *E. huxleyi* 2090 gDNA + 1% DMSO (Rep 1)
- F: 500 ng *E. huxleyi* 2090 gDNA + 1% DMSO (Rep 2)
- G: 500 ng 2090 gDNA + 100 ng/ml HHQ (Rep 1)
- H: 500 ng 2090 gDNA + 100 ng/ml HHQ (Rep 2)
