# Supplementary material for: Bacterial Quorum-Sensing Signal Arrests Phytoplankton Cell Division and Impacts Virus-Induced Mortality
Source: PubMed Central journal article supplement (PMC8125044; doi:10.1128/msphere.00009-21), 2021-05-12

Supplemental Figure 7.

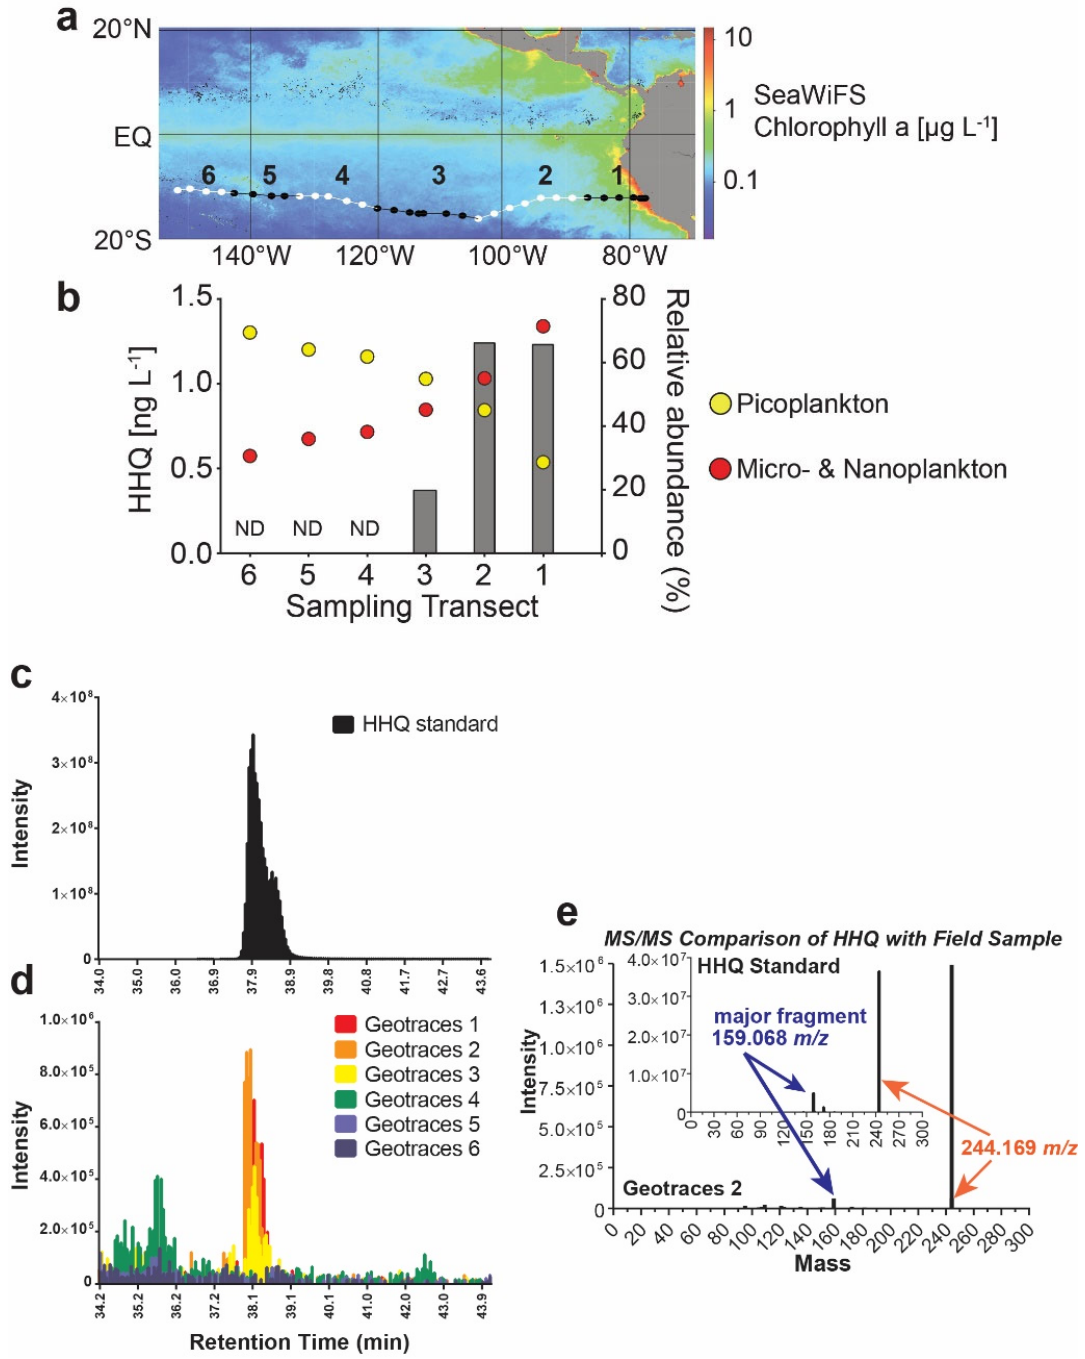

Supplement: mSphere.00009-21-sf007.pdf [file mSphere.00009-21-sf007.pdf]
